# Supplementary material for: Comparative release kinetics of small drugs (ibuprofen and acetaminophen) from multifunctional mesoporous silica nanoparticles
Source: Royal Society of Chemistry journal article supplement (doi:10.1039/c9tb02494h), 2020-01-01
Supplement: c9tb02494h1.pdf [file c9tb02494h1.pdf]

## Supporting Information

for

### **Comparative release kinetics of small drugs (ibuprofen and acetaminophen) from multifunctional mesoporous silica nanoparticles**

Eun-Bi Lim, Tran Anh Vy, Sang-Wha Lee\*

Department of Chemical and Biological Engineering, Gachon University, 1342

Seongnamdaero, Seongnam-si 13120, Republic of Korea

\*E-mail: [Lswha@gachon.ac.kr](mailto:Lswha@gachon.ac.kr), TEL: +82-31-750-5360

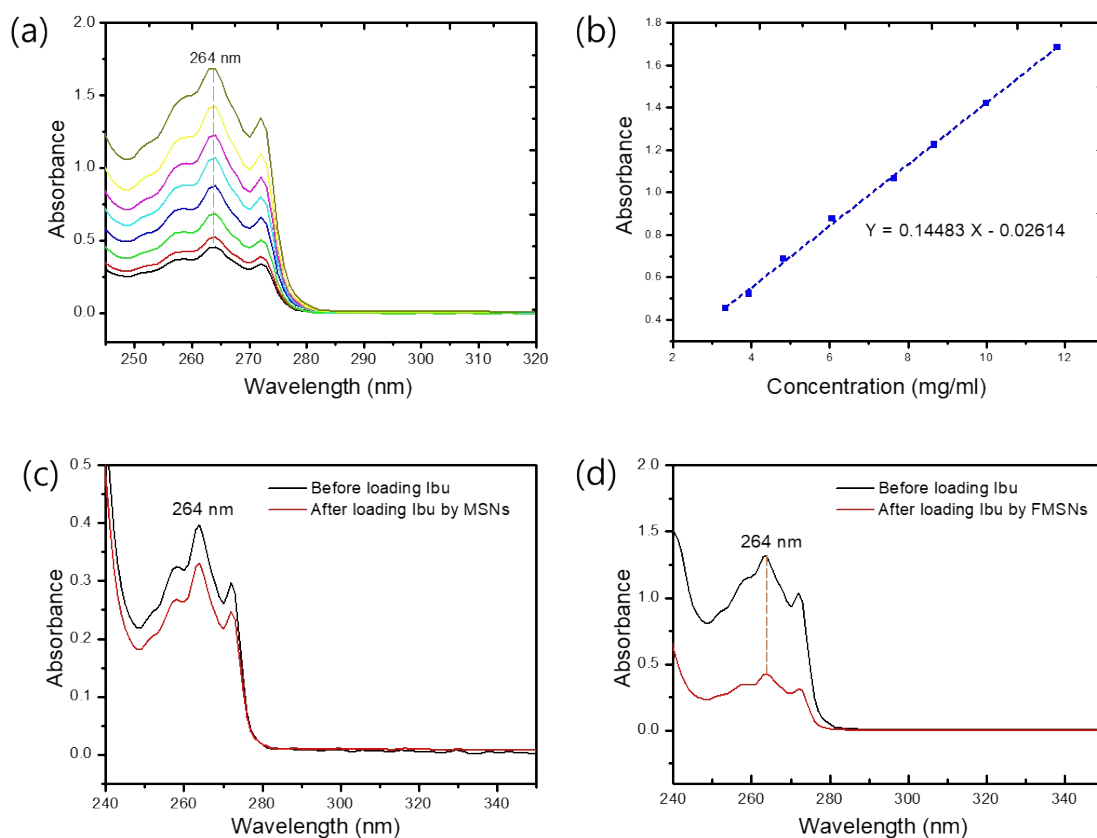

**Fig. S1.** (a) The UV-VIS spectrum of Ibuprofen in ethanol, (b) the linear part of the standard curve of ibuprofen absorption at 264nm in ethanol over concentration ranges (3-12 mg/mL), (c) UV-Vis absorption spectra of the solution before and after loading ibuprofen by MSNs, (d) UV-Vis absorption spectra of the solution before and after loading ibuprofen by FMSNs.

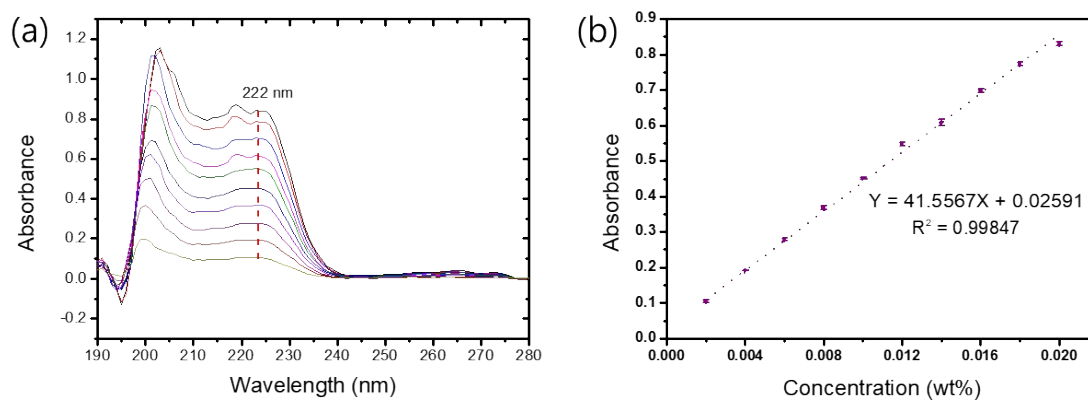

**Fig. S2.** (a) The UV-VIS spectrum of Ibuprofen in PBS, (b) Linear part of the standard curve of ibuprofen absorption at 222 nm in PBS: concentration ranges from 0.002 to 0.02 wt%.

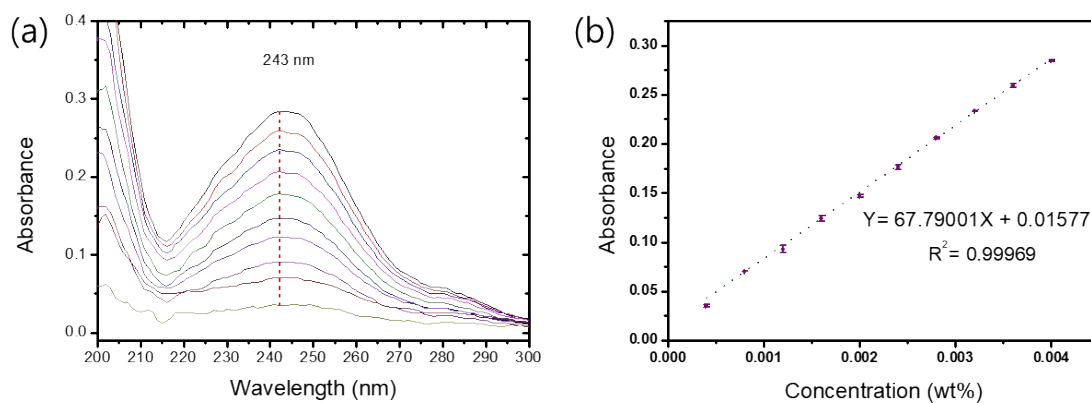

**Fig. S3.** (a) The UV-VIS spectrum of Acetaminophen in PBS, (b) Linear part of the standard curve of acetaminophen absorption at 243 nm in PBS: concentration ranges from 0.0004 to 0.004 wt%.

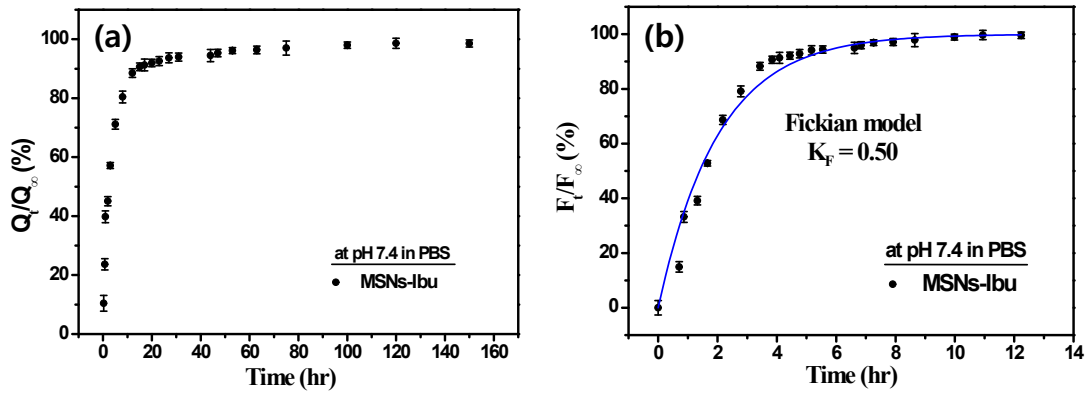

**Fig. S4.** Absorbance profiles of released Ibuprofen from MSNs in PBS at 37 °C; (a) the correlation between cumulative release fraction and release times; (c) the model fits of release kinetics of MSNs-Ibu by the exponential Fickian model.

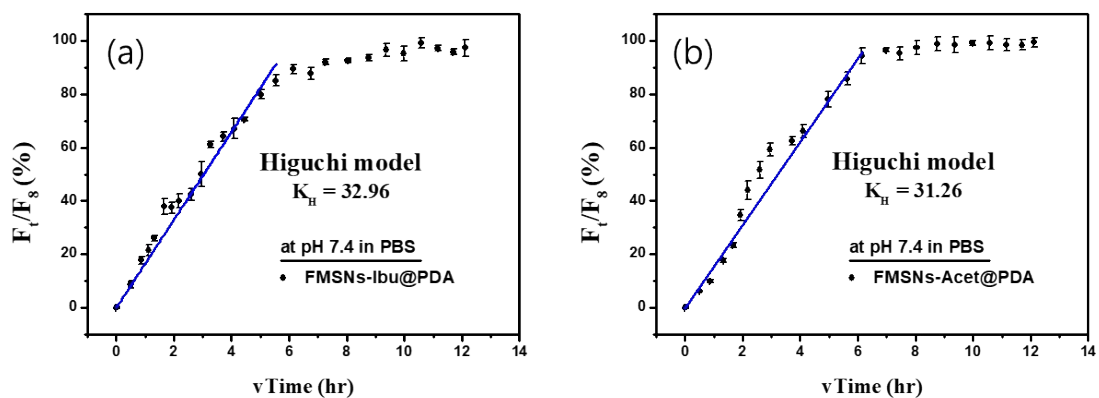

**Fig. S5.** The Model fits of (a) Ibuprofen and (b) Acetaminophen release from FMSNs-Drug@PDA in PBS at 37 °C by the Higuchi model versus cumulative time or square root time.

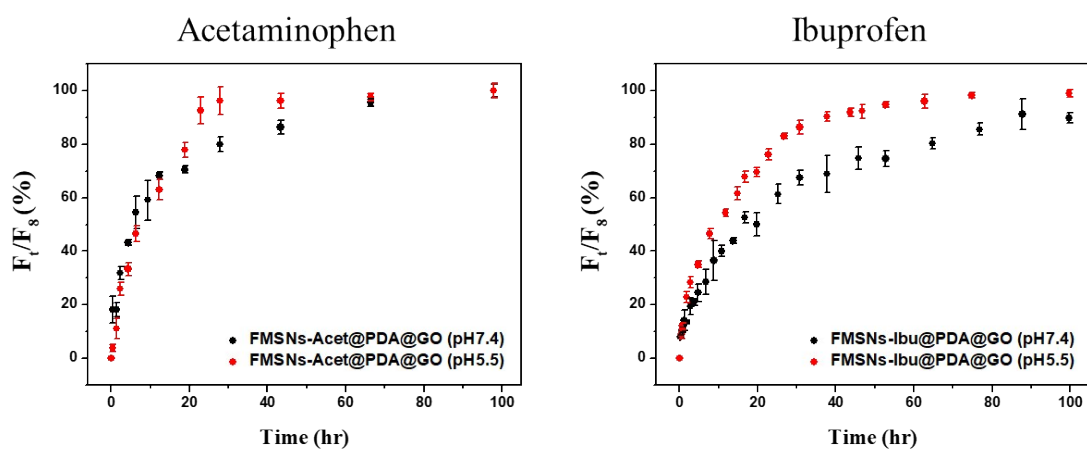

**Fig S6.** The comparative release rate of acetaminophen and ibuprofen of FMSNs-drug@PDA@GO at different pHs.

**Table S1.** Physicochemical properties of as-prepared samples measured by BET-BJT, DLS and SEM instruments.

| Particle type | BET- BJH method                                |                                                |                              | SEM Particle size (nm) | DLS Particle size (nm) |
|---------------|------------------------------------------------|------------------------------------------------|------------------------------|------------------------|------------------------|
|               | surface area <sup>1)</sup> (m <sup>2</sup> /g) | Pore volume <sup>2)</sup> (cm <sup>3</sup> /g) | Pore size <sup>2)</sup> (nm) |                        |                        |
| MSNs          | 209                                            | 0.46                                           | 8.7                          | 125 ± 5                | 124 ± 10               |
| FMSNs         | 3391                                           | 4.00                                           | 4.7                          | 123 ± 3                | 123 ± 2                |
| FMSNs@PDA     | -                                              | -                                              | -                            | 127 ± 5                | 126 ± 14               |
| FMSNs@PDA@GO  | -                                              | -                                              | -                            | 129 ± 2                | 129 ± 9                |

1) The surface area was estimated according to the BET method.

2) The pore size and pore volume were estimated by the BJH analysis.



**Table S2.** The summary of fitted parameter values of kinetic models applied to the release data of MSNs-Drug@A-F, MSNs-Drug@A-F@PDA, MSNs-Drug@A-F@PDA@GO (A: Fick's law, B: Higuchi model, C: K-P model)

| Case | As-prepared MSNs         | Diffusion models | Formula                         | Parameters                          |
|------|--------------------------|------------------|---------------------------------|-------------------------------------|
| A    | FMSNs-Ibu                | Fick's law       | $F_t/F_\infty = 1 - e^{-k_F t}$ | $k_F = 0.38$                        |
|      | FMSNs-Acet               | Fick's law       | $F_t/F_\infty = 1 - e^{-k_F t}$ | $k_F = 0.62$                        |
| B    | FMSNs-Ibu@PDA@GO (pH7.4) | Higuchi model    | $F_t/F_\infty = k_{Ht}^{1/2}$   | $k_{H1} = 23.62$<br>$k_{H2} = 8.87$ |
|      | FMSNs-Ibu@PDA@GO (pH5.5) | Higuchi model    | $F_t/F_\infty = k_{Ht}^{1/2}$   | $k_H = 32.04$                       |
|      | FMSNs-Acet@PDA@GO        | Higuchi model    | $F_t/F_\infty = k_{Ht}^{1/2}$   | $k_H = 25.40$                       |
|      | FMSNs-Ibu@PDA            | Higuchi model    | $F_t/F_\infty = k_{Ht}^{1/2}$   | $k_H = 32.96$                       |
|      | FMSNs-Acet@PDA           | Higuchi model    | $F_t/F_\infty = k_{Ht}^{1/2}$   | $k_H = 31.26$                       |
| C    | FMSNs-Ibu@PDA            | K-P model        | $F_t/F_\infty = k_R t^n$        | $k_R = 19.61, n = 0.47$             |
|      | FMSNs-Acet@PDA           | K-P model        | $F_t/F_\infty = k_R t^n$        | $k_R = 15.00, n = 0.62$             |

\* K-P model indicate the Korsmeyer-Peppas model.

\*\* Ibu indicates Ibuprofen.

\*\*\* Acet indicates Acetaminophen.
